# Supplementary figures and images for: Dissecting the Chloroplast Proteome of the Potato (Solanum Tuberosum L.) and Its Comparison with the Tuber Amyloplast Proteome
Source: MDPI journal article supplement (doi:10.3390/plants11151915), 2022-07-24

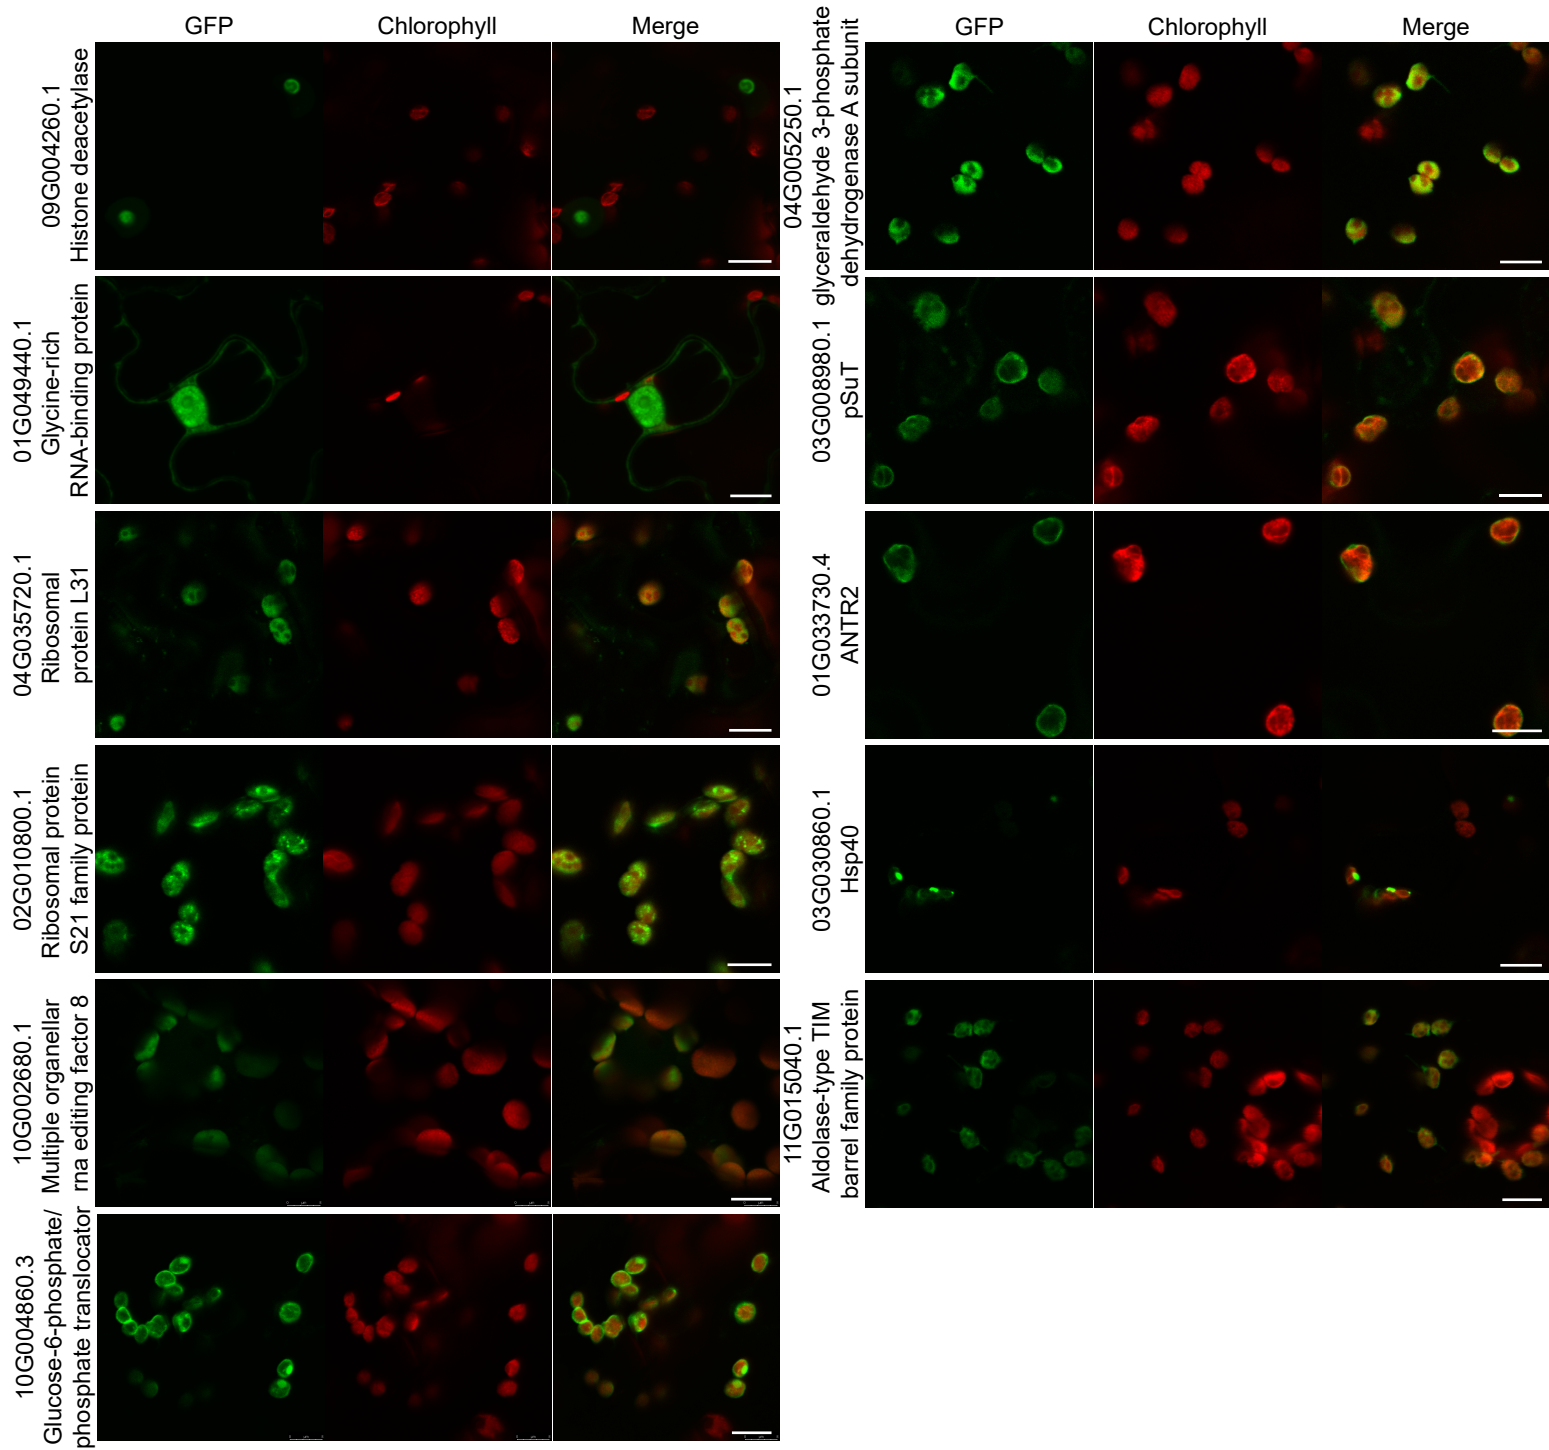

Supplement: s1 [file s1]

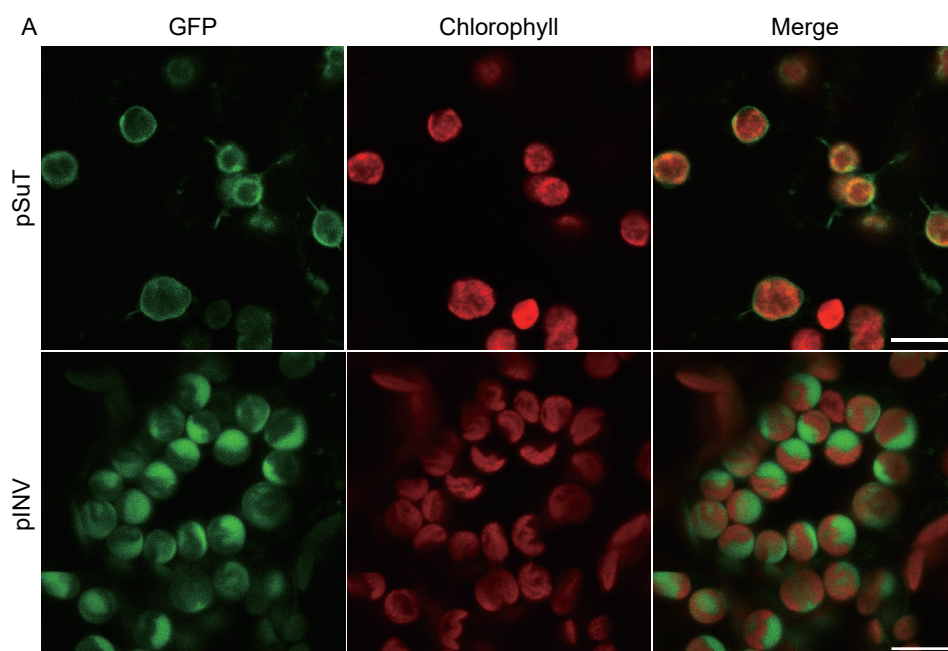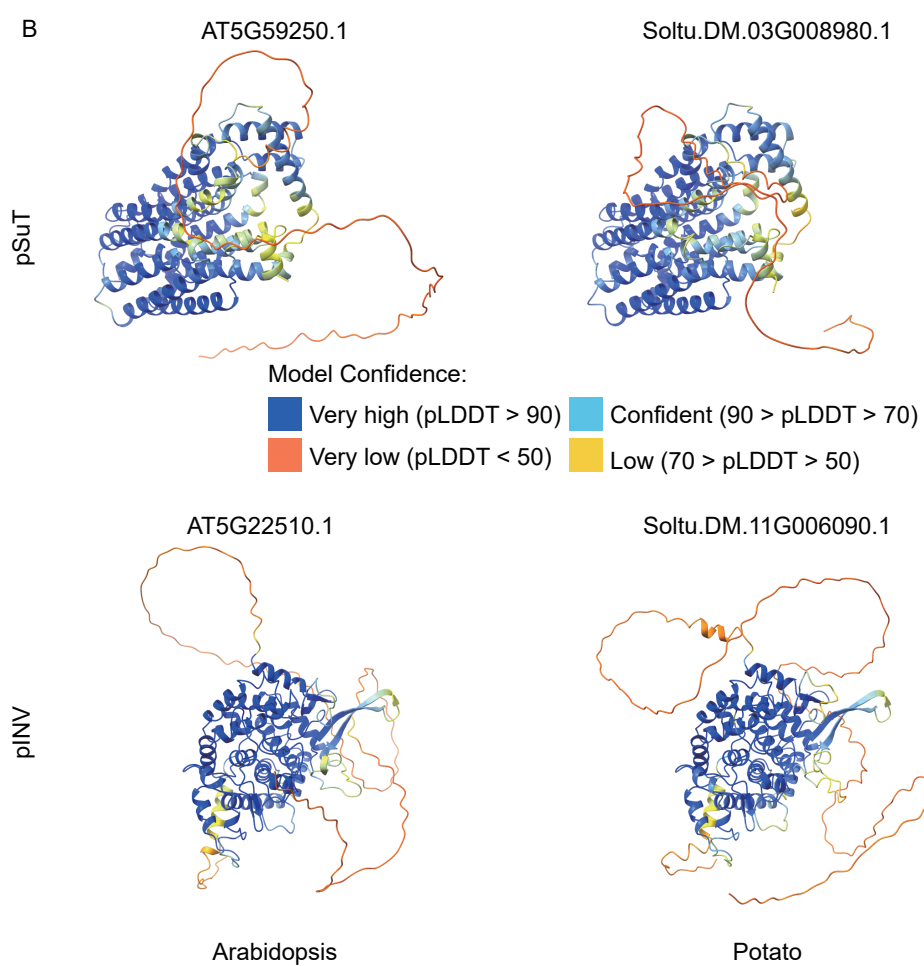

Supplement: s1 [file s1]
